# Supplementary material for: Sphingosine-1-Phosphate Lyase Deficient Cells as a Tool to Study Protein Lipid Interactions
Source: PubMed Central journal article supplement (PMC4839656; doi:10.1371/journal.pone.0153009), 2016-04-21
Supplement: pone.0153009.s001.pdf [file pone.0153009.s001.pdf]

$$\text{relative difference(Hela)} = \frac{\text{feature}_{\text{Hela}\Delta\text{SGPL1}} - \text{feature}_{\text{Hela}}}{\text{feature}_{\text{Hela}}} \quad (1)$$

$$\text{relative difference(MEF)} = \frac{\text{feature}_{\text{Sgpl1}(-/-)} - \text{feature}_{\text{Sgpl1}(+/+)}}{\text{feature}_{\text{Sgpl1}(+/+)}} \quad (2)$$
