# Supplementary material for: Sphingosine-1-Phosphate Lyase Deficient Cells as a Tool to Study Protein Lipid Interactions
Source: PubMed Central journal article supplement (PMC4839656; doi:10.1371/journal.pone.0153009), 2016-04-21

**A**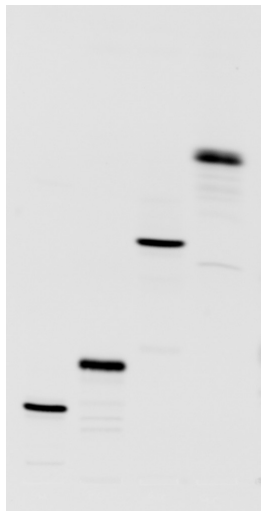

alkyne SM  
pacFA PC  
pacFA GlcCer  
pacFA Cer

**B**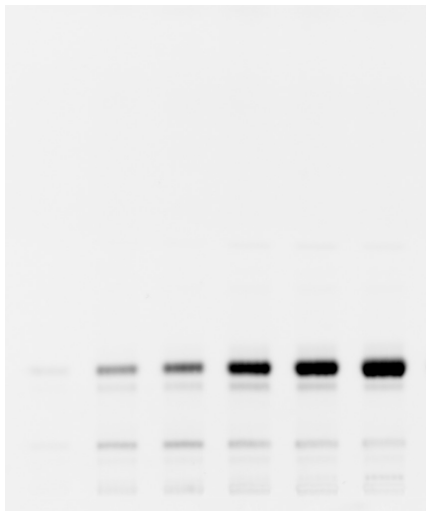

0.1 0.5 1 5.0 10 15  
Amount (nmol)

**C**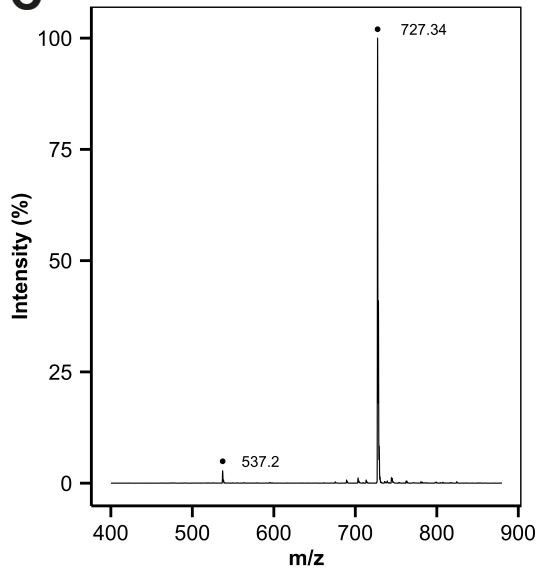

Supplement: pone.0153009.s004.pdf [file pone.0153009.s004.pdf]
