# Supplementary material for: Sphingosine-1-Phosphate Lyase Deficient Cells as a Tool to Study Protein Lipid Interactions
Source: PubMed Central journal article supplement (PMC4839656; doi:10.1371/journal.pone.0153009), 2016-04-21

**A**

SQPL1 1>acattgcaccaagtatgagccctggcagctaattgcatggagtg-t-cgtgtggaccctgctgatagctctgggatatgagttgtcttccagccagag>97  
 S3.4\_4x 1>ACATTGCACCAAGTATGAGCCCTGGCAGCTAAT---A-----T-CGTGTGGACCCTGCTGATAGTCTGGGGATATGAGTTTGTCTTCCAGCCAGAG>87  
 S3.4\_3x 1>ACATTGCACCAAGTATGAGCCCTGGCAGCTAATTGCATGGAGTGT-CGTGTGGACCCTGCTGATAGTCTGGGGATATGAGTTTGTCTTCCAGCCAGAG>98

**B**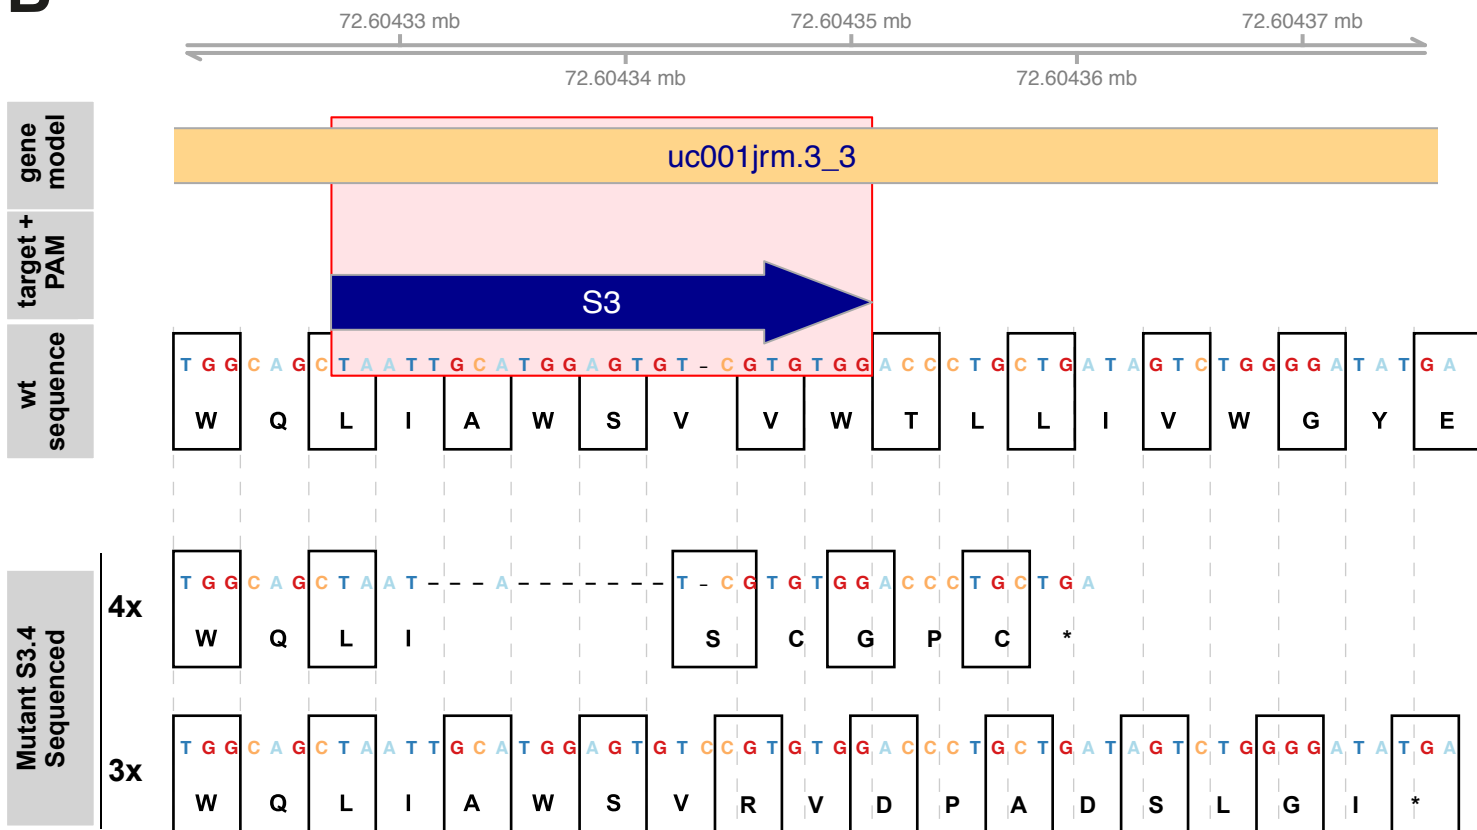

Supplement: pone.0153009.s008.pdf [file pone.0153009.s008.pdf]
