# Supplementary material for: Sphingosine-1-Phosphate Lyase Deficient Cells as a Tool to Study Protein Lipid Interactions
Source: PubMed Central journal article supplement (PMC4839656; doi:10.1371/journal.pone.0153009), 2016-04-21

**A**

| sgRNA | Orientation | Sequence                    |
|-------|-------------|-----------------------------|
| A1    | fwd         | CACCGCGAAGTCCGGCGGGTCCGAC   |
| A1    | rev         | AAACGTTCGGACCCGCCGGACTTCGC  |
| A2    | fwd         | CACCGGAAACCGCAGAGGTTCGCGAC  |
| A2    | rev         | AAACGTTCGCGACCTCTGCGGTTTCC  |
| A3    | fwd         | CACCGGGTTCGGCGGGCGATGGCCGTC |
| A3    | rev         | AAACGACGGCCATCGCCGCCGACCC   |
| A4    | fwd         | CACCGGATGGTGCAGGAGCGCGAGA   |
| A4    | rev         | AAACTCTCGCGCTCCTGCACCATCC   |

**B**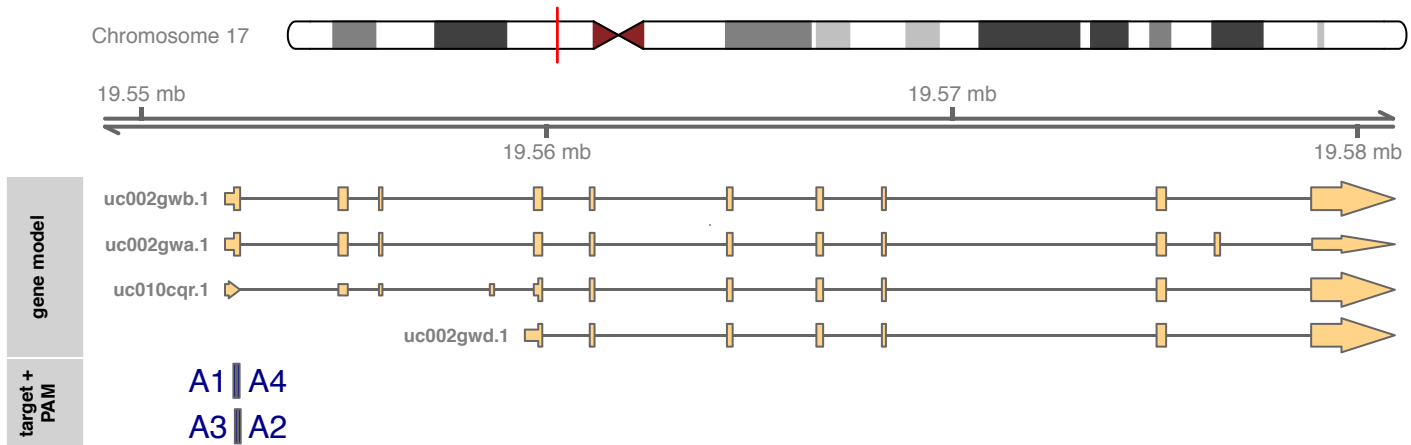**C**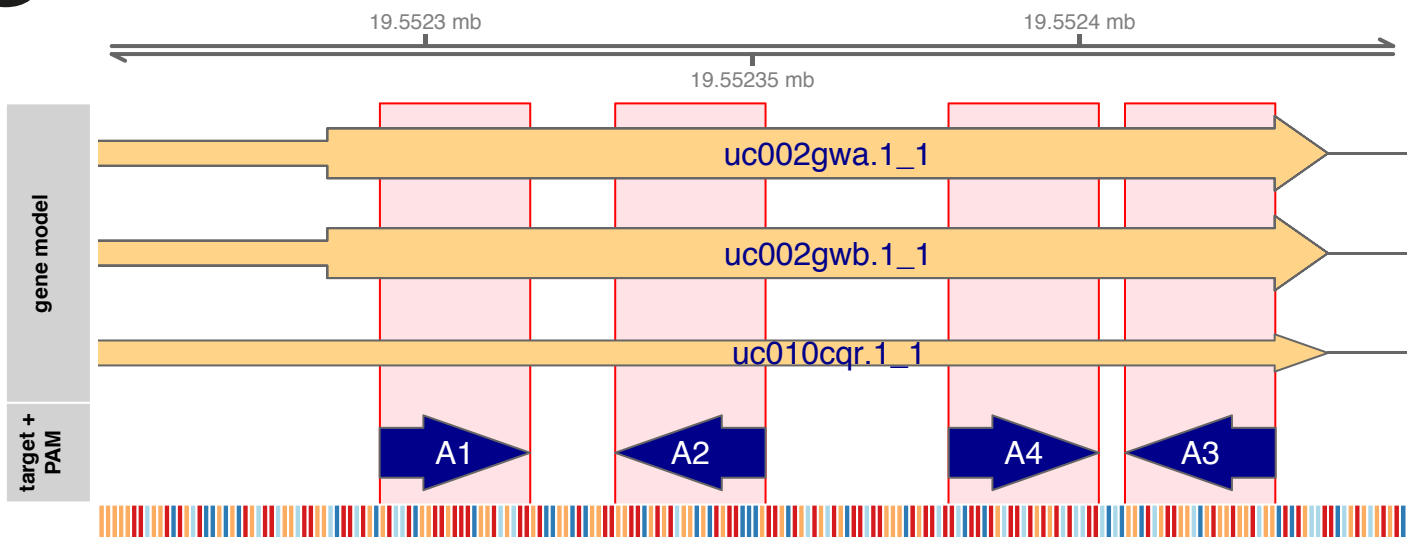

Supplement: pone.0153009.s009.pdf [file pone.0153009.s009.pdf]
