# Supplementary material for: Sphingosine-1-Phosphate Lyase Deficient Cells as a Tool to Study Protein Lipid Interactions
Source: PubMed Central journal article supplement (PMC4839656; doi:10.1371/journal.pone.0153009), 2016-04-21

**A**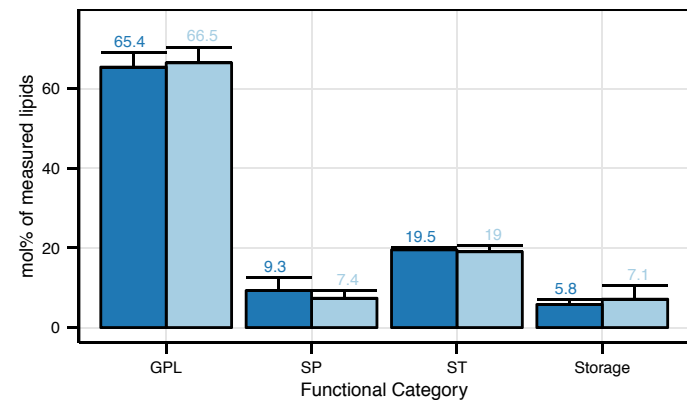**B**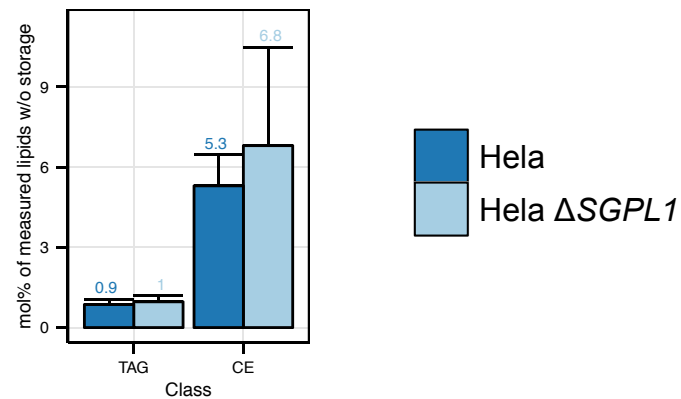**C**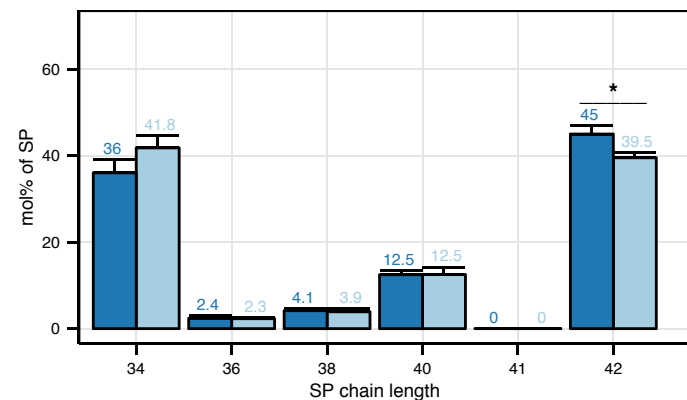**D**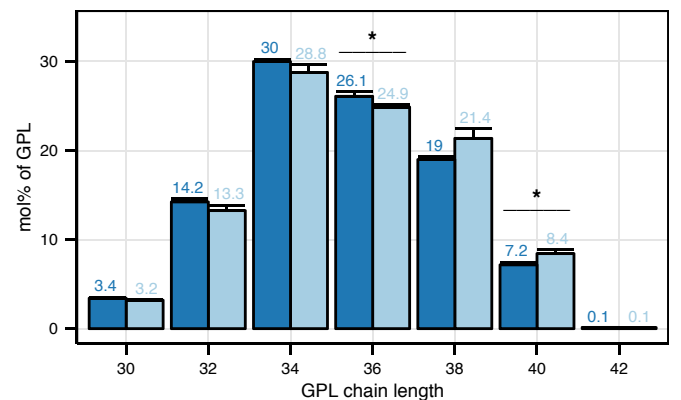**E**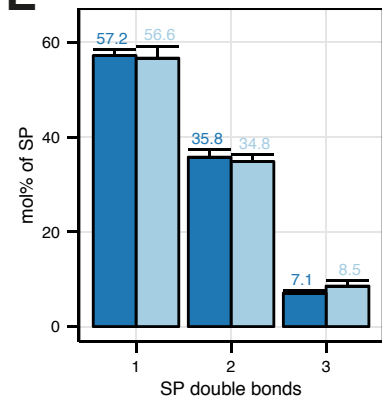**F**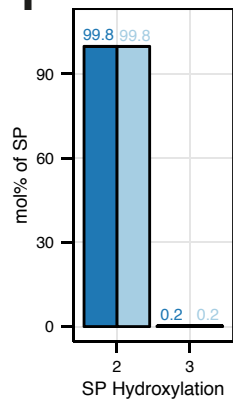**G**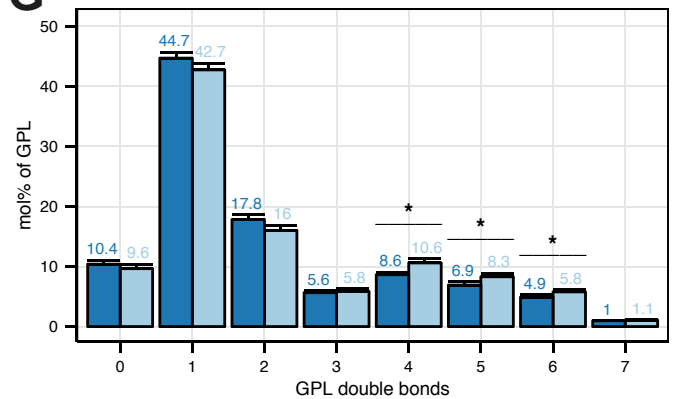

Supplement: pone.0153009.s010.pdf [file pone.0153009.s010.pdf]
