# Supplementary material for: Sphingosine-1-Phosphate Lyase Deficient Cells as a Tool to Study Protein Lipid Interactions
Source: PubMed Central journal article supplement (PMC4839656; doi:10.1371/journal.pone.0153009), 2016-04-21

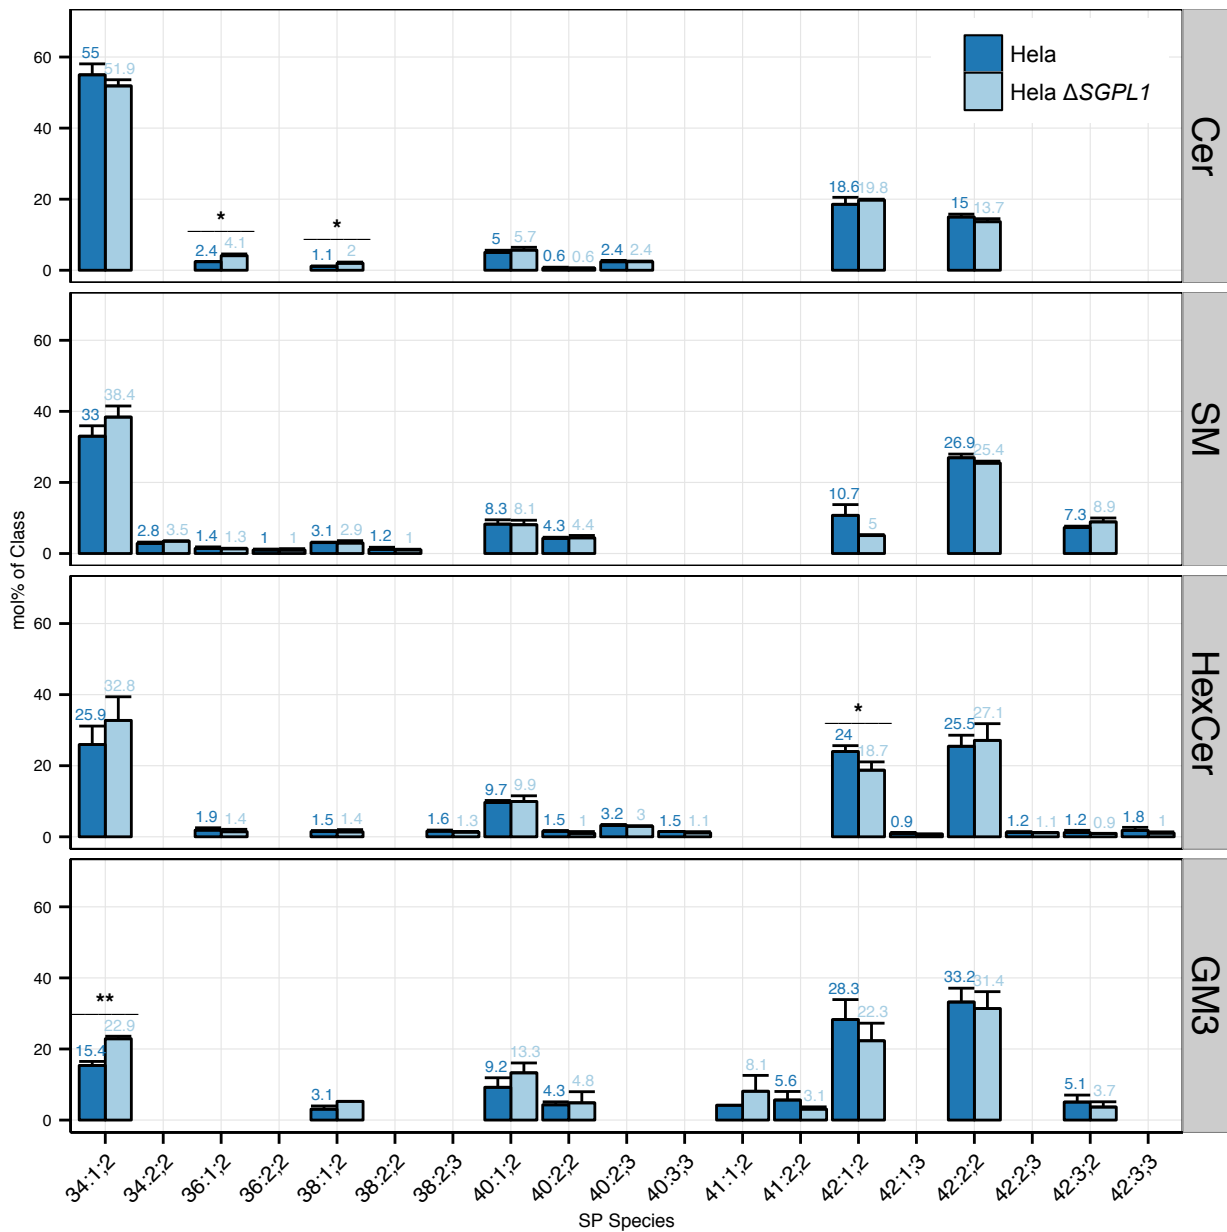

Supplement: pone.0153009.s011.pdf [file pone.0153009.s011.pdf]
