# Supplementary material for: Sphingosine-1-Phosphate Lyase Deficient Cells as a Tool to Study Protein Lipid Interactions
Source: PubMed Central journal article supplement (PMC4839656; doi:10.1371/journal.pone.0153009), 2016-04-21
Supplement: pone.0153009.s016.pdf [file pone.0153009.s016.pdf]

|               |   |   |   |   |   |   |   |   |   |
|---------------|---|---|---|---|---|---|---|---|---|
| <i>UV</i>     | - | + | + | - | + | + | - | + | + |
| <i>pacSph</i> | + | - | + | + | - | + | + | - | + |

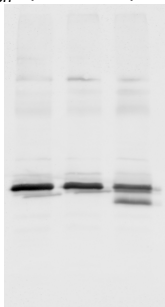

FLAG

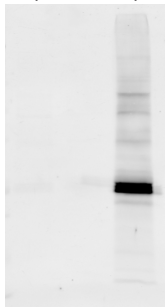

Alex647

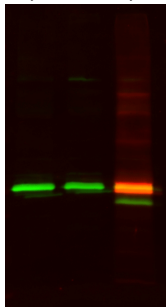

Overlay

— 75  
— 50  
— 37  
— 25  
— 20  
— 15
