# Supplementary material for: Sphingosine-1-Phosphate Lyase Deficient Cells as a Tool to Study Protein Lipid Interactions
Source: PLoS One. 2016 Apr 21;11(4):e0153009. doi: 10.1371/journal.pone.0153009 (PMC4839656; doi:10.1371/journal.pone.0153009)
Supplement: S6 Table — Protein LFQ intensities of HeLa ΔSGPL1 cells where no intensity was found for HeLa cells. Only hits with high LFQ intensities in all replicates are shown. Data are plotted in Fig 5C. (XLSX) [file pone.0153009.s023.xlsx]

## Sheet: S6_Table.csv
Gene Name	Protein names	Intensity
CLCC1	Chloride channel CLIC-like protein 1	993130000
GAA	Lysosomal alpha-glucosidase	864290000
FAM91A1	Protein FAM91A1	653680000
PSMG4	Proteasome assembly chaperone 4	636220000
IFRD1	Interferon-related developmental regulator 1	597360000
SHPK	Sedoheptulokinase	510030000
ROR2	Tyrosine-protein kinase transmembrane receptor ROR2	497210000
VPS13C	Vacuolar protein sorting-associated protein 13C	467880000
SOGA2	Protein SOGA2	449530000
POGLUT1	Protein O-glucosyltransferase 1	400740000
PDXP	Pyridoxal phosphate phosphatase	394110000
H2AFX	Histone H2A.x	319340000
